# Supplementary material for: Clinical criteria for genetic testing in pediatric oncology show a low specificity and miss every 4th child carrying a cancer predisposition
Source: bioRxiv or medRxiv preprint supplement (doi:10.1101/2022.10.22.22281392), 2022-10-22
Supplement: Supplementary file [file media-2.pdf]

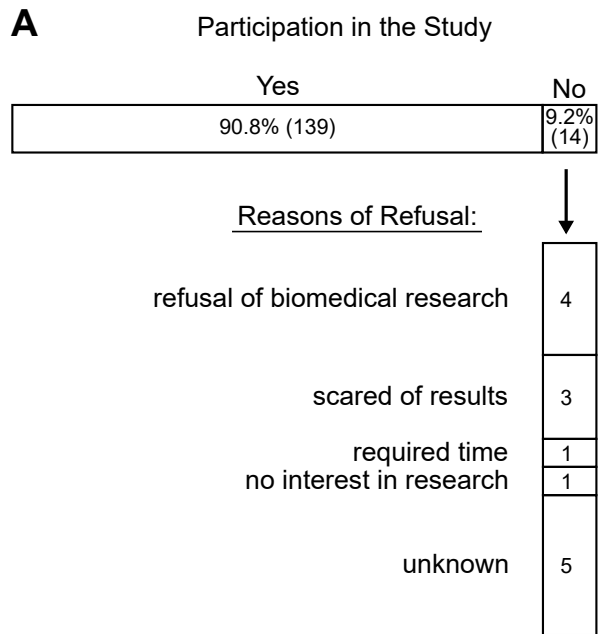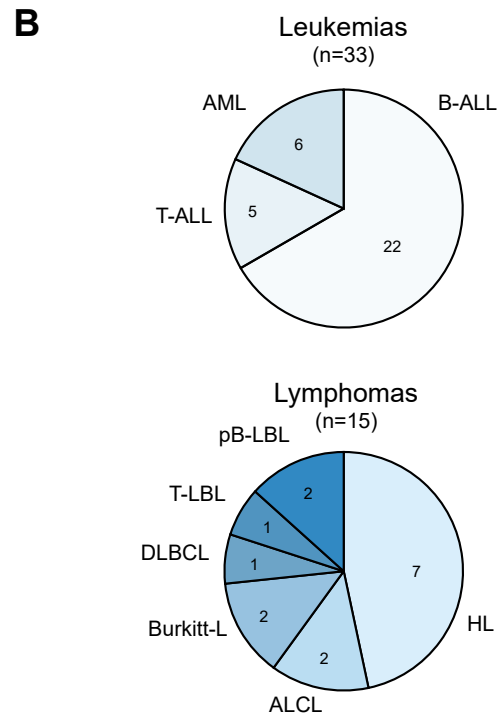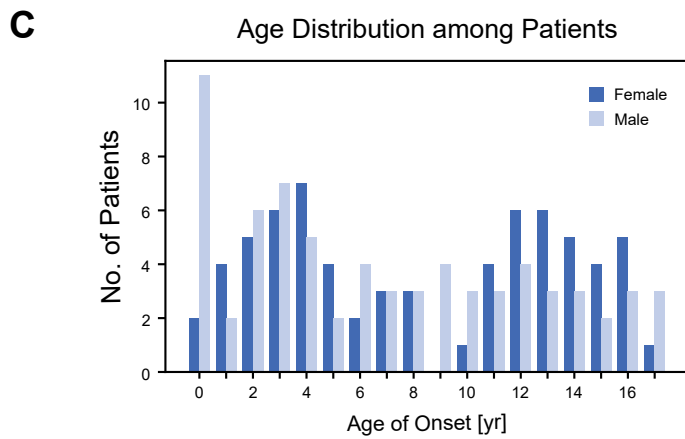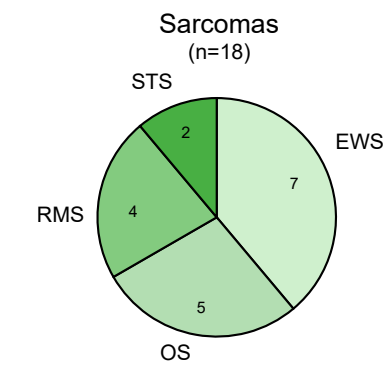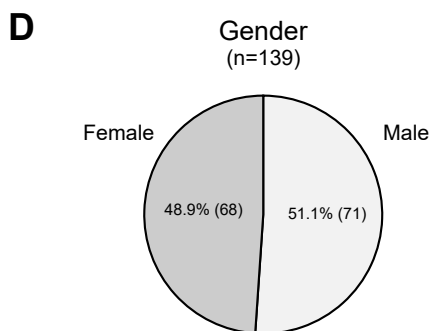

**Figure S1**

**A**

**Checklist**

**Diagnosis**

- ALL (15;21; iAMP21; low hypodiploid; relapse with mutated *TP53*), JMML, MDS
- Blastoma (Hemangio-, Hepato- (*CTNNB1* Wildtype), Gonado-, Pleuro-pulmonary-, Pineo-, Retino-, Pituitary blastoma or adenoma)
- Carcinoma (Hepatocellular-, Choroid plexus-, Medullary and non-medullary thyroid-, Small cell carcinoma of the ovary, Squamous cell-, Basal cell-, Colorectal-, Renal cell-, Parathyroid carcinoma or adenoma)
- Medulloblastoma (*SHH* activated; *WNT* activated/*CTNNB1* Wildtype), Medulloepithelioma
- Rhabdoid tumor, Botryoid RMS of the cervix or bladder (Fusion-negative), Fetal rhabdomyomas
- Gastrointestinal stromal tumor, Germ-strand stromal tumor
- Adrenocortical carcinoma
  - Cystic nephroma
- Atypical teratoid rhabdoid tumor
  - Infantile myofibromatosis
- Chondromesenchymal hamartoma
  - Melanoma
- Endolymphatic sac tumors
  - Meningioma
- Large cell calcifying Sertoli cell tumor
  - Myxoma
- Malignant peripheral nerve sheath tumor
  - Nephroblastoma
- Neuroendocrine tumor, carcinoid
  - Neurofibroma
- Optic glioma (with clinical *NF1* signs)
  - Schwannoma
- Paranglioma / Pheochromocytoma
  - Sertoli-leydig cell tumor
- Subependymal giant cell astrocytoma
- Other extremely rare childhood cancer entities or typical adult tumors with early onset

**Family History**

- including a three-generation pedigree
- $\geq 2$  malignancies  $\leq 18$  years of age
- first-degree relative (parent or sibling) with cancer  $< 45$  years of age
- $\geq 2$  second-degree relatives with cancer  $< 45$  years of age (on the same side of the family)
- parents are consanguineous

**Phenotype**

- Congenital anomalies (e.g. organs, bones, oral clefting, teeth, eyes, ears, brain, urogenital anomalies)
- Facial dysmorphism
- Growth (e.g. length, head circumference, birth weight, asym. growth)
- Skin anomalies (e.g. aberrant pigmentation i.e.  $> 2$  café-au-lait spots, vascular skin changes, hypersensitivity for sunlight, multiple benign tumors of the skin)
- Immune deficiency
- Endocrine anomalies (e.g. primary hyperparathyroidism, premature puberty, gigantism/ acromegaly, Cushing Syndrome)

**> 1 Cancer**

= Child with  $\geq 2$  malignancies (secondary, bilateral, multifocal, metachronal)

**Somatic Mutation**

= Tumor analysis with underlying predisposition (e.g. *TP53*)

**B**

**Checklist: Diagnosis (n=25)**

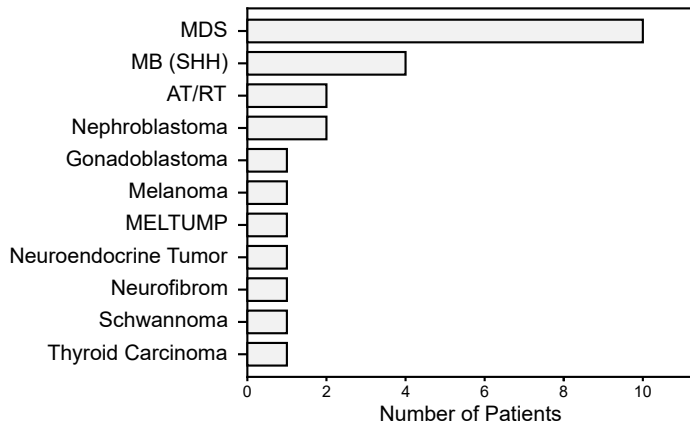

**C**

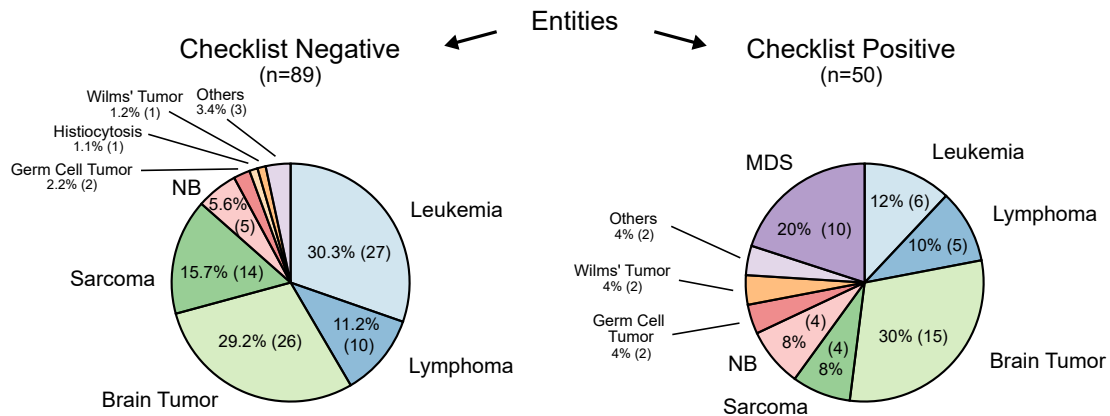

**Figure S2**

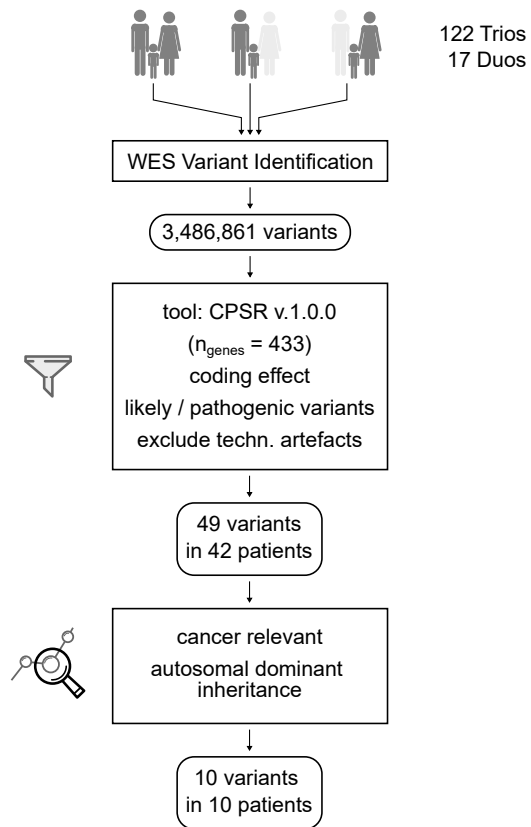

**Figure S3**

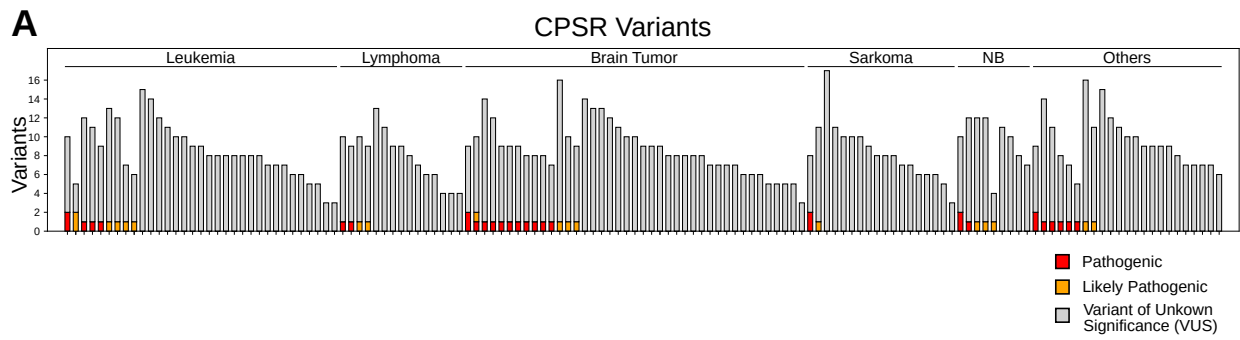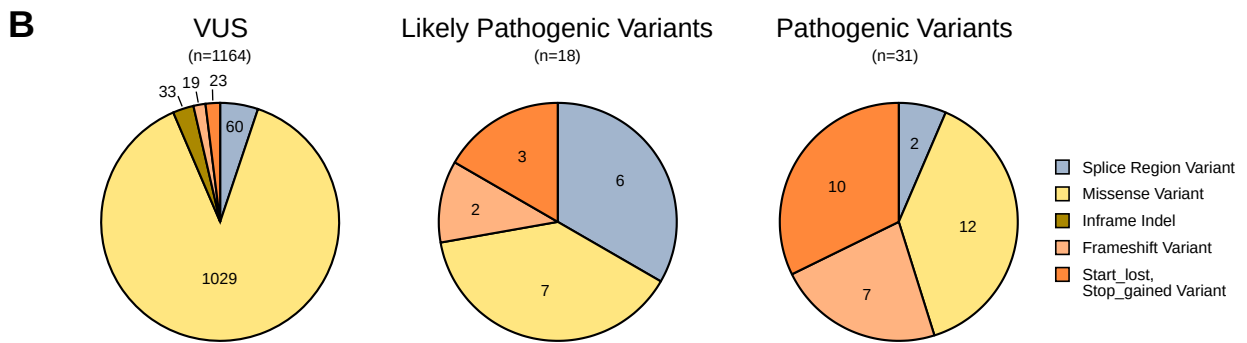

**Figure S4**

Patients with cancer  
predisposing variant  
(n = 11)

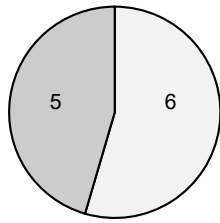

Patients without cancer  
predisposing variant  
(n = 39)

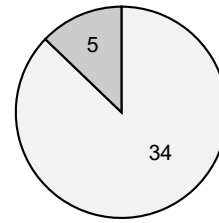

Positive Checklist  
Categories / Patient:  
□ one  
■ multiple

**Figure S5**
